# Supplementary material for: Structural preferences in strong anion–π and halogen-bonded complexes: π- and σ-holes vs. frontier orbitals interaction
Source: Royal Society of Chemistry journal article supplement (doi:10.1039/c7nj04843b), 2018-01-01
Supplement: c7nj04843b1.pdf [file c7nj04843b1.pdf]

**Supporting Information Available for**

**Structural preferences in strong anion- $\pi$  and halogen-bonded complexes:**

**$\pi$ - and  $\sigma$ -holes vs frontier orbitals interaction**

Olivia Grounds,<sup>a</sup> Matthias Zeller,<sup>b</sup> Sergiy V. Rosokha<sup>\*a</sup>

---

<sup>\*</sup> <sup>a</sup>Department of Chemistry, Ball State University, Muncie, IN, USA, 47306. E-mail: [svrosokha@bsu.edu](mailto:svrosokha@bsu.edu).

<sup>b</sup>Department of Chemistry, Purdue University, West Lafayette, IN, USA, 47907

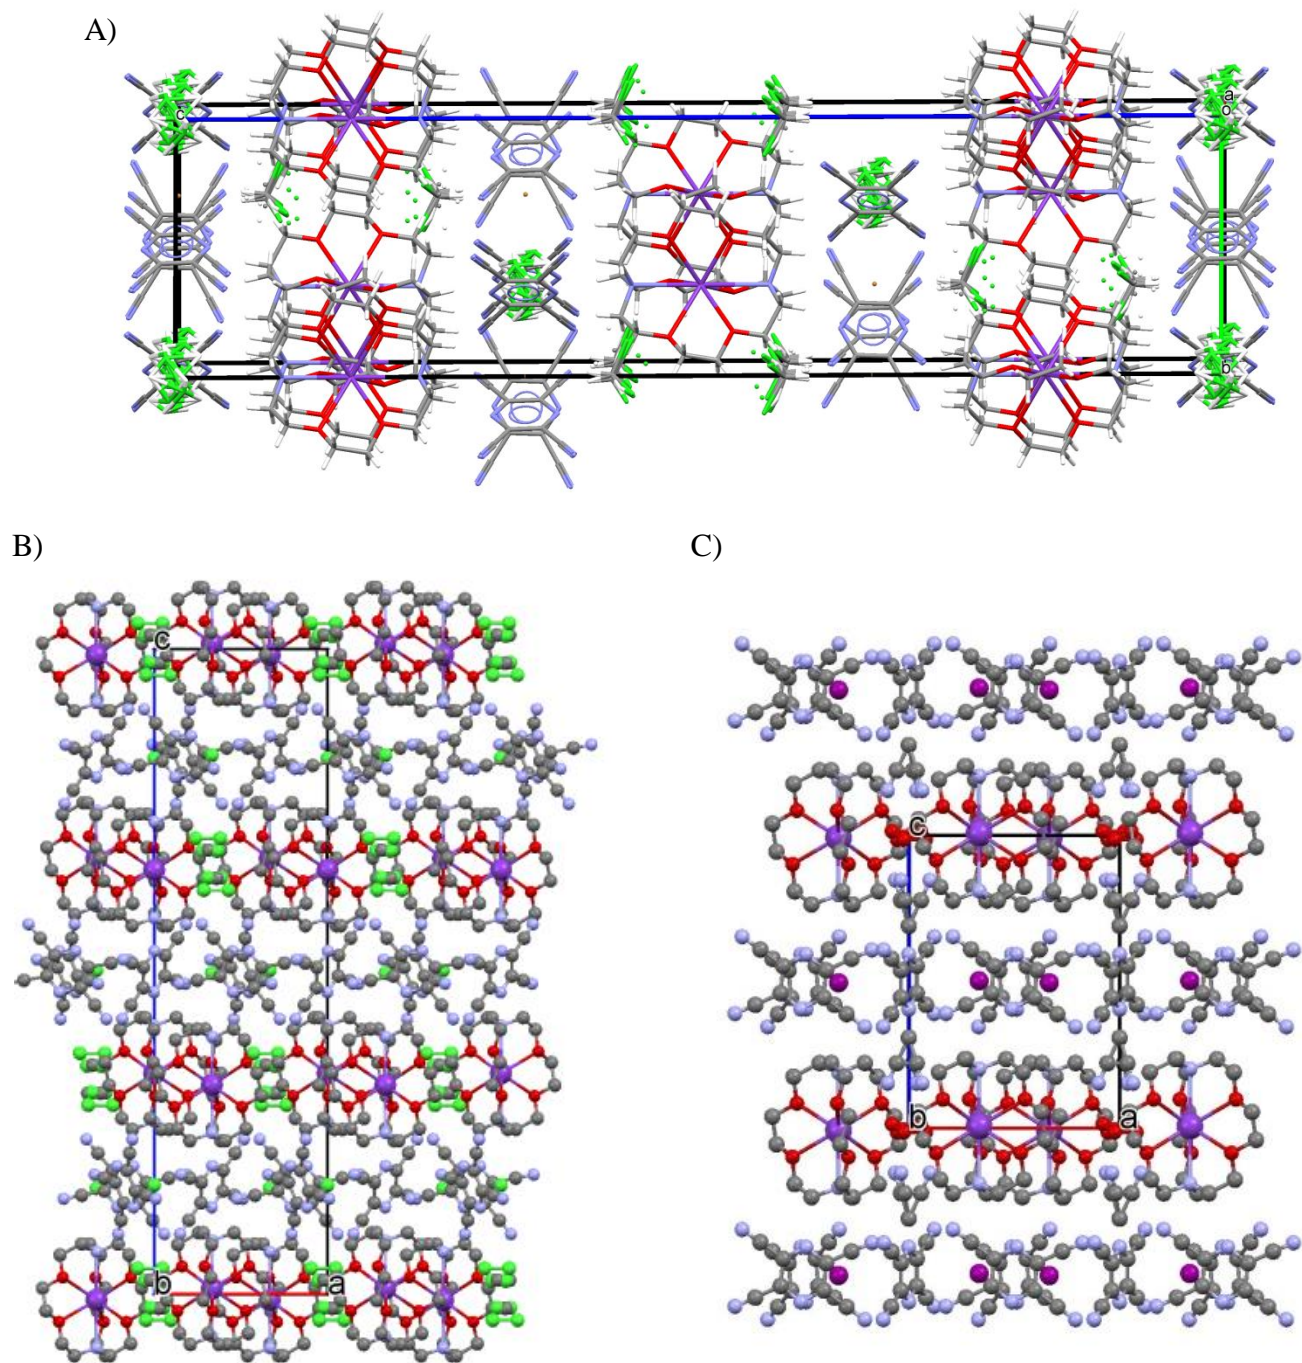

Figure S1 X-ray structures of  $K(\text{crp})\text{Br}\cdot\text{TCP}$  (A),  $K(\text{crp})\text{Cl}\cdot\text{TCP}$  (B) and  $K(\text{crp})\text{I}\cdot\text{TCP}$  (C) co-crystals

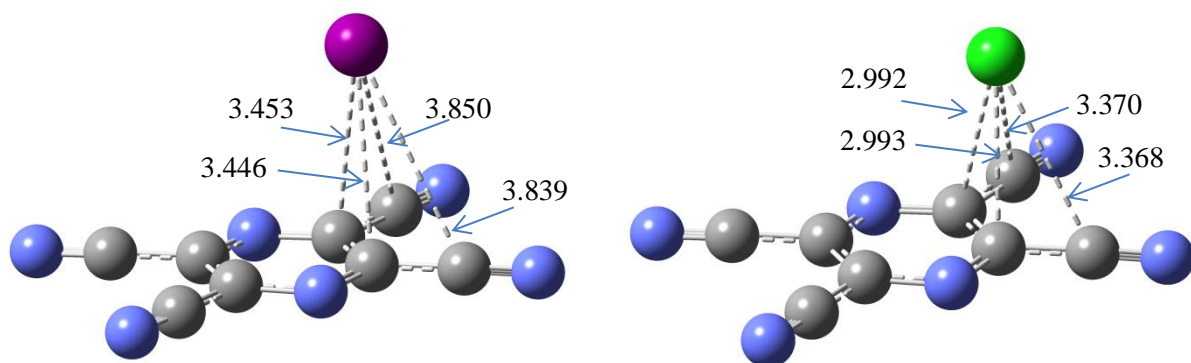

Figure S2. Calculated structures of TCP•I (left) and TCP•Cl (right) complexes (M062X/def2tzvpp computations in CH<sub>2</sub>Cl<sub>2</sub>, numbers indicate interatomic distances in Å).

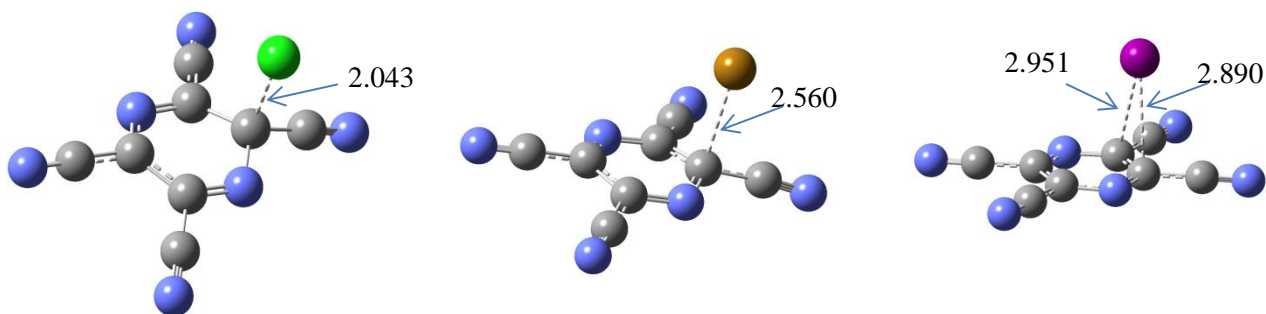

Figure S3. Calculated structures of TCP•Cl (left) and TCP•Br (center) and TCP•I (right) complexes (M062X/def2tzvpp computations in the gas phase, numbers indicate interatomic distances in Å).

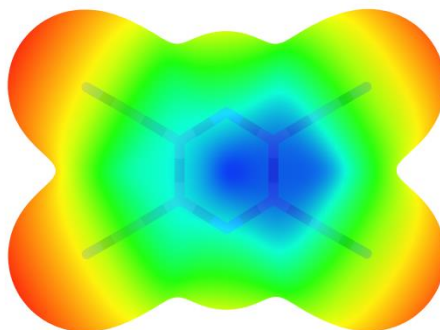

Figure S4. ESPs of the TCP molecule in the presence of the negative (-1) point charge located at the positions of the Br<sup>-</sup> anion in the optimized (in dichloromethane) TCP•Br<sup>-</sup> complex.

Table S1. Interatomic distances in the TCP•X<sup>-</sup> co-crystals.<sup>a</sup>

| X               | Counter-ion                    | d <sub>X...C(Ar)</sub> , Å <sup>b</sup> |       | d <sub>X...C(cyano)</sub> , Å <sup>c</sup> |       |
|-----------------|--------------------------------|-----------------------------------------|-------|--------------------------------------------|-------|
| Br              | K <sup>+</sup> (crp)           | 3.265                                   | 3.259 | 3.437                                      | 3.454 |
| Br              | Bu <sub>4</sub> N <sup>+</sup> | 3.169                                   | 3.411 | 3.253                                      | 3.578 |
| Br <sup>d</sup> | Pr <sub>4</sub> N <sup>+</sup> | 3.149                                   | 3.458 | 3.222                                      | 3.692 |
| Br <sup>d</sup> | Et <sub>4</sub> N <sup>+</sup> | 3.154                                   | 3.235 | 3.372                                      | 3.510 |
| I               | K <sup>+</sup> (crp)           | 3.425                                   | 3.444 | 3.739                                      | 3.793 |
| I <sup>d</sup>  | Et <sub>4</sub> N <sup>+</sup> | 3.517                                   | 3.659 | 3.647                                      | 3.818 |
| I <sup>d</sup>  | Bu <sub>4</sub> N <sup>+</sup> | 3.477                                   | 3.640 | 3.907                                      | 4.216 |
| Cl              | K <sup>+</sup> (crp)           | 3.147                                   | 3.161 | 3.255                                      | 3.278 |
| Cl              | Pr <sub>4</sub> N <sup>+</sup> | 3.055                                   | 3.411 | 3.105                                      | 3.677 |
| Cl <sup>d</sup> | Bu <sub>4</sub> N <sup>+</sup> | 3.066                                   | 3.363 | 3.114                                      | 3.568 |

a) The sums of the van der Waals radii for Cl...C, Br...C and I...C contacts are 3.45 Å, 3.55 Å and 3.68 Å respectively.[17 ] b) Distance from the halide to the aromatic ring carbons. c) Distance from the halide to the cyano-group carbons. d) Y. Rosokha, S. Lindeman, S. Rosokha and J. Kochi, *Angew. Chem., Int. Ed.*, 2004, **43**, 4650.

Table S2. Halogen bond geometries in the R-Br•X<sup>-</sup> co-crystals.<sup>a</sup>

| Co-crystals (ref. code)                                      | Contact  | D(Z-X...Y), Å | ∠(Z-X...Y), deg | ∠X-X...Br), deg | R <sub>XY</sub> |
|--------------------------------------------------------------|----------|---------------|-----------------|-----------------|-----------------|
| (Pr <sub>4</sub> N)N <sub>3</sub> ·CBr <sub>4</sub>          | Br3...N1 | 2.875(3)      | 167.66(12)      | 99.3(2)         | 0.85            |
| (POCZAK)                                                     | Br2...N1 | 2.806(3)      | 176.90(11)      | 108.2(2)        | 0.83            |
|                                                              | Br4...N1 | 3.216(4)      | 160.48(18)      | 79.0(2)         | 0.95            |
| (Pr <sub>4</sub> N)NCO·CBr <sub>4</sub>                      | Br2...N1 | 2.823(3)      | 176.39(12)      | 109.7(3)        | 0.83            |
| (PODDAP)                                                     | Br4...N1 | 2.937(3)      | 167.40(12)      | 96.5(2)         | 0.86            |
|                                                              | Br3...N1 | 3.188(3)      | 173.74(12)      | 79.8(2)         | 0.94            |
| (Pr <sub>4</sub> N)NCO·CBr <sub>3</sub> NO <sub>2</sub>      | Br2...N3 | 3.004(3)      | 167.74(9)       | 94.4(2)         | 0.88            |
| (POCZEO)                                                     | Br1...N3 | 2.763(3)      | 176.06(9)       | 112.9(2)        | 0.81            |
|                                                              | Br3...N3 | 3.212(3)      | 173.50(9)       | 80.3(2)         | 0.94            |
| 2((Pr <sub>4</sub> N)NCS)·CBr <sub>4</sub>                   | Br4...S1 | 3.2309(11)    | 171.76(11)      | 93.23(13)       | 0.92            |
| (PODCUI)                                                     | Br1...S1 | 3.2147(11)    | 170.15(11)      | 108.83(13)      | 0.91            |
|                                                              | Br3...N1 | 3.013(3)      | 167.07(13)      | 139.2(3)        | 0.89            |
|                                                              | Br2...N2 | 2.897(4)      | 172.74(13)      | 136.5(3)        | 0.85            |
| 2((Pr <sub>4</sub> N)NCS)·CBr <sub>3</sub> CONH <sub>2</sub> | Br2...S2 | 3.2294(6)     | 174.50(6)       | 96.21(8)        | 0.88            |
| (POTDET)                                                     | Br3...S1 | 3.3377(6)     | 178.02(6)       | 79.13(8)        | 0.91            |
|                                                              | Br1...S1 | 3.5286(6)     | 151.85(7)       | 123.56(8)       | 0.95            |

a) S. Rosokha, C. Stern, A. Swartz and R. Stewart, *Phys. Chem. Chem. Phys.*, 2014, **16**, 12968. b) R<sub>XY</sub> = D<sub>X...Y</sub>/(r<sub>X</sub> + r<sub>Y</sub>), where D<sub>X...Y</sub> is the intermolecular separation between X and Y, and r<sub>X</sub> and r<sub>Y</sub> are their van der Waals radii, i.e. 1.85 Å for bromine, 1.55 Å for nitrogen and 1.80 Å for sulfur.

Table S3 Values of electrostatic potential (in a.u.) on the surface (0.001density) of the pseudohalide anions<sup>a</sup> X<sup>-</sup> in the absence and in the presence of point charges (PC)

| X <sup>-</sup>              | PC                   | -V (N <sub>top</sub> ) | -V (N <sub>perp</sub> ) | -V (S <sub>perp</sub> ) |
|-----------------------------|----------------------|------------------------|-------------------------|-------------------------|
| NCS <sup>-</sup>            | No PC                | 0.204                  | 0.200                   | 0.191                   |
|                             | PC-N <sub>top</sub>  | 0.211                  | 0.204                   | 0.189                   |
|                             | PC-N <sub>perp</sub> | 0.210                  | 0.207                   | 0.190                   |
|                             | PC-S <sub>perp</sub> | 0.202                  | 0.201                   | 0.198                   |
| N <sub>3</sub> <sup>-</sup> | No PC                | 0.216                  | 0.209                   |                         |
|                             | PC-N <sub>top</sub>  | 0.223                  | 0.211                   |                         |
|                             | PC-N <sub>perp</sub> | 0.220                  | 0.215                   |                         |
| NCO <sup>-</sup>            | No PC                | 0.229                  | 0.224                   |                         |
|                             | PC-N <sub>top</sub>  | 0.234                  | 0.225                   |                         |
|                             | PC-N <sub>perp</sub> | 0.233                  | 0.229                   |                         |

a) V(N<sub>top</sub>), V(N<sub>perp</sub>), V(S<sub>perp</sub>) - ESP at the top of the nitrogen atom along the extension of C-N or N-N bond, on the surface of the nitrogen atom perpendicular to C-N or N-N bond and on the surface of the sulfur atom perpendicular to C-S bond (see below). PC-N<sub>top</sub>, PC-N<sub>perp</sub>, PC-S<sub>perp</sub> - values of ESPs calculated with the point charge (0.17) placed along the extension of C-N or N-N bond, perpendicular to C-N or N-N bond or perpendicular to C-S bond (see below)

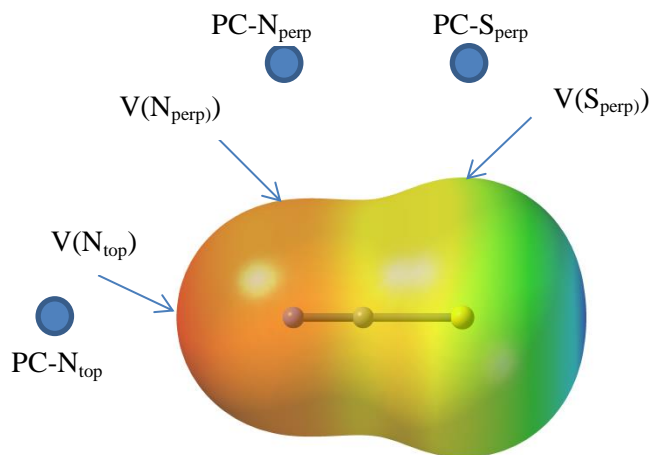

Table S4. Interaction energies,  $\Delta E^*$ , (in kcal/mol) in the calculated R-Br•X<sup>-</sup> complexes <sup>a</sup>

| R-Br               | X                           | C-Br...S <sup>b</sup> | C-Br...N <sup>b</sup> | C-Br...N <sup>c</sup> |
|--------------------|-----------------------------|-----------------------|-----------------------|-----------------------|
| CBr <sub>3</sub> F | NCS <sup>-</sup>            | -3.625                | -3.092                | -2.984                |
| CBr <sub>4</sub>   | NCS <sup>-</sup>            | -3.889                | -3.249                | -3.213                |
| CBr <sub>4</sub>   | NCO <sup>-</sup>            |                       | -4.651                | -4.260                |
| CBr <sub>3</sub> F | N <sub>3</sub> <sup>-</sup> |                       | -4.878                | -3.208                |
| CBr <sub>4</sub>   | N <sub>3</sub> <sup>-</sup> |                       | -5.225                | -3.583                |

a)  $\Delta E^* = E_{\text{comp}} - (E_{\text{R-Br}} + E_{\text{X}})$ , where  $E_{\text{comp}}$ ,  $E_{\text{R-Br}}$  and  $E_{\text{X}}$  are electronic energies of the complex, R-Br and X<sup>-</sup> anion (from M062X/def2tzvpp computations in CH<sub>2</sub>Cl<sub>2</sub>). b) Fully-optimized minimum with S...N or Br...N halogen bonding. c) Pairs resulted from constrained optimization with linear C-N...Br or N-N...Br angle.

Table S5. Energies (in Hartree) of the calculated complexes and their components. <sup>a</sup>

|                    |                             | E            | E+ZPE         |
|--------------------|-----------------------------|--------------|---------------|
| TCP                | Br <sup>-</sup>             | -3207.64518  | -3207.574147  |
| TCP                | Cl <sup>-</sup>             | -1093.64031  | -1093.569207  |
| TCP                | I <sup>-</sup>              | -931.08558   | -931.014411   |
| -                  | Br <sup>-</sup>             | -2574.36766  | -2574.36766   |
| -                  | Cl <sup>-</sup>             | -460.36033   | -460.36033    |
| -                  | I <sup>-</sup>              | -297.81015   | -297.81015    |
| TCP                | -                           | -633.26413   | -633.193537   |
| CBr <sub>3</sub> F | NCS <sup>-</sup> (Br...S)   | -8351.712653 | -8351.693552  |
|                    | NCS <sup>-</sup> (Br...N)   | -8351.711804 | -8351.692605  |
| CBr <sub>4</sub>   | NCS <sup>-</sup> (Br...S)   | -10826.04745 | -8351.693552  |
|                    | NCS <sup>-</sup> (Br...N)   | -10826.04643 | -10826.029467 |
| CBr <sub>3</sub> F | NCO <sup>-</sup>            | -8028.748971 | -8028.727624  |
| CBr <sub>4</sub>   | NCO <sup>-</sup>            | -10503.08372 | -10503.064649 |
| CBr <sub>3</sub> F | N <sub>3</sub> <sup>-</sup> | -8024.84389  | -8024.822074  |
| CBr <sub>4</sub>   | N <sub>3</sub> <sup>-</sup> | -10499.17882 | -10499.159546 |
| -                  | NCS <sup>-</sup>            | -491.1918022 | -491.182954   |
| -                  | NCO <sup>-</sup>            | -168.2268634 | -168.21582    |
| -                  | N <sub>3</sub> <sup>-</sup> | -164.3210425 | -164.309706   |
| CBr <sub>3</sub> F | -                           | -7860.515074 | -7860.505479  |
| CBr <sub>4</sub>   | -                           | -10334.84945 | -10334.8422   |

a) From M062X/def2tzvpp computations in CH<sub>2</sub>Cl<sub>2</sub>.

Atomic coordinates of the calculated complexes (M062X/def2tzvpp computations in CH<sub>2</sub>Cl<sub>2</sub>).

|     |                 |     |                 |             |              |             |             |
|-----|-----------------|-----|-----------------|-------------|--------------|-------------|-------------|
| TCP | Br <sup>-</sup> | N   | -0.62855500     | -0.62616300 | 1.44406700   |             |             |
|     |                 | C   | -1.69409800     | -0.29960100 | 0.72359100   |             |             |
|     |                 | C   | -1.69830300     | -0.40669000 | -0.66955700  |             |             |
|     |                 | N   | -0.63679100     | -0.84031600 | -1.33769800  |             |             |
|     |                 | C   | 0.43596700      | -1.11523400 | -0.62684900  |             |             |
|     |                 | C   | 0.44022600      | -1.00664900 | 0.77688700   |             |             |
|     |                 | C   | 1.61369200      | -1.55983500 | -1.32944600  |             |             |
|     |                 | N   | 2.54636700      | -1.94783400 | -1.86853500  |             |             |
|     |                 | C   | 1.62184200      | -1.33998100 | 1.53203300   |             |             |
|     |                 | N   | 2.55632500      | -1.64283700 | 2.12041900   |             |             |
|     |                 | C   | -2.86619100     | 0.14808200  | 1.43188200   |             |             |
|     |                 | N   | -3.81105600     | 0.50075500  | 1.97438000   |             |             |
|     |                 | C   | -2.87332900     | -0.06900600 | -1.43187900  |             |             |
|     |                 | N   | -3.81909500     | 0.20126300  | -2.01840200  |             |             |
|     |                 | Br  | 1.61916500      | 1.83941100  | -0.132560001 |             |             |
|     |                 | TCP | Cl <sup>-</sup> | N           | -0.28578500  | -1.39616700 | -0.44114100 |
|     |                 |     |                 | C           | -1.40108500  | -0.69781600 | -0.25519500 |
| C   | -1.40097100     |     |                 | 0.69726500  | -0.25626900  |             |             |
| N   | -0.28548900     |     |                 | 1.39513200  | -0.44300600  |             |             |
| C   | 0.82486000      |     |                 | 0.70435000  | -0.57177600  |             |             |
| C   | 0.82469800      |     |                 | -0.70580500 | -0.57098900  |             |             |
| C   | 2.05559600      |     |                 | 1.43416600  | -0.74970000  |             |             |
| N   | 3.03403200      |     |                 | 1.99941200  | -0.93461500  |             |             |
| C   | 2.05523500      |     |                 | -1.43603800 | -0.74861300  |             |             |
| N   | 3.03355500      |     |                 | -2.00155600 | -0.93331800  |             |             |
| C   | -2.62655000     |     |                 | -1.43412900 | -0.07724600  |             |             |
| N   | -3.61382600     |     |                 | -1.99767500 | 0.06161800   |             |             |
| C   | -2.62628000     |     |                 | 1.43417500  | -0.07972300  |             |             |
| N   | -3.61339300     |     |                 | 1.99826700  | 0.05808800   |             |             |
| Cl  | 1.52254800      |     |                 | 0.00241800  | 2.25198100   |             |             |
| TCP | I <sup>-</sup>  |     |                 | N           | 1.02321700   | 0.85834100  | 1.40371200  |
|     |                 |     |                 | C           | 1.98287600   | 0.26924900  | 0.70418600  |
|     |                 | C   | 1.98810200      | 0.28670400  | -0.69477900  |             |             |
|     |                 | N   | 1.03308300      | 0.89255400  | -1.38646200  |             |             |
|     |                 | C   | 0.05123100      | 1.42959100  | -0.69167000  |             |             |
|     |                 | C   | 0.04618200      | 1.41225700  | 0.71525900   |             |             |
|     |                 | C   | -1.02005800     | 2.06313800  | -1.41880100  |             |             |
|     |                 | N   | -1.86629400     | 2.59644200  | -1.97630300  |             |             |
|     |                 | C   | -1.02984100     | 2.02908000  | 1.44976900   |             |             |
|     |                 | N   | -1.87903300     | 2.55091600  | 2.01359400   |             |             |
|     |                 | C   | 3.04474800      | -0.37474500 | 1.43487900   |             |             |
|     |                 | N   | 3.90213500      | -0.89041500 | 1.99209300   |             |             |
|     |                 | C   | 3.05638900      | -0.33720900 | -1.43347000  |             |             |
|     |                 | N   | 3.91887200      | -0.83729400 | -1.99696900  |             |             |
|     |                 | I   | -1.72908700     | -1.45023000 | -0.01396000  |             |             |

|                  |                              |                  |                  |             |             |             |             |
|------------------|------------------------------|------------------|------------------|-------------|-------------|-------------|-------------|
| CBr <sub>3</sub> | NCS <sup>-</sup><br>(Br...S) | Br               | -0.82275300      | -0.29796700 | -0.03557000 |             |             |
|                  |                              | Br               | 2.16951500       | -1.42746200 | -0.02200800 |             |             |
|                  |                              | Br               | 1.66047300       | 1.69342700  | -0.40727800 |             |             |
|                  |                              | C                | 1.01959400       | 0.06742500  | 0.43958400  |             |             |
|                  |                              | F                | 1.09380300       | 0.24296200  | 1.76481200  |             |             |
|                  |                              | C                | -4.32290200      | 0.46023900  | 0.27119700  |             |             |
|                  |                              | S                | -3.94996500      | -0.87611700 | -0.64050100 |             |             |
|                  | NCS <sup>-</sup><br>(Br...N) | N                | -4.58259400      | 1.39789800  | 0.91000100  |             |             |
|                  |                              | Br               | 0.63987400       | -0.40512600 | -0.01962400 |             |             |
|                  |                              | Br               | -1.68847800      | 1.77783600  | -0.25740700 |             |             |
|                  |                              | Br               | -2.41841900      | -1.31991400 | -0.17387900 |             |             |
|                  |                              | C                | -1.17769900      | 0.04041600  | 0.44594500  |             |             |
|                  |                              | N                | 3.39335000       | -1.09540800 | -0.54381300 |             |             |
|                  |                              | F                | -1.27775300      | 0.10117200  | 1.78008100  |             |             |
| CBr <sub>4</sub> | NCS <sup>-</sup><br>(Br...S) | C                | 4.32175400       | -0.45087700 | -0.25522600 |             |             |
|                  |                              | S                | 5.63923700       | 0.46076600  | 0.15147100  |             |             |
|                  |                              | Br               | 1.41839600       | -0.55925500 | 1.77850000  |             |             |
|                  |                              | Br               | 1.87918600       | 1.55904700  | -0.52605900 |             |             |
|                  |                              | Br               | 1.22152400       | -1.44997400 | -1.25343900 |             |             |
|                  |                              | Br               | -1.03791600      | 0.40732200  | 0.00060700  |             |             |
|                  |                              | C                | 0.86357300       | -0.01033200 | 0.00005700  |             |             |
|                  | NCS <sup>-</sup><br>(Br...N) | S                | -4.15673400      | 1.05445000  | -0.00211600 |             |             |
|                  |                              | N                | -4.77188600      | -1.70189400 | 0.00498100  |             |             |
|                  |                              | C                | -4.51869300      | -0.56597200 | 0.00205900  |             |             |
|                  |                              | Br               | 1.51116300       | 1.71662700  | -0.81617100 |             |             |
|                  |                              | Br               | 1.71951900       | -0.00903900 | 1.82922300  |             |             |
|                  |                              | Br               | -0.85366600      | -0.24364700 | -0.01417900 |             |             |
|                  |                              | Br               | 1.93063200       | -1.41591300 | -0.99690400 |             |             |
| NCO <sup>-</sup> | C                            | 1.06325100       | 0.00852200       | -0.00143900 |             |             |             |
|                  | S                            | -6.40014300      | 0.22861900       | 0.00550600  |             |             |             |
|                  | N                            | -3.69526500      | -0.56728700      | -0.01563900 |             |             |             |
|                  | C                            | -4.81301200      | -0.23650000      | -0.00648300 |             |             |             |
|                  | Br                           | 1.03610000       | -0.36152400      | -0.02553700 |             |             |             |
|                  | Br                           | -1.36445300      | 1.75071200       | -0.25716900 |             |             |             |
|                  | Br                           | -2.00269500      | -1.36799300      | -0.17477600 |             |             |             |
| CBr <sub>3</sub> | NCO <sup>-</sup>             | C                | -0.79743200      | 0.02828100  | 0.44353500  |             |             |
|                  |                              | N                | 3.71512600       | -0.93872000 | -0.58541500 |             |             |
|                  |                              | F                | -0.90284200      | 0.08597200  | 1.77895900  |             |             |
|                  |                              | C                | 4.45674600       | -0.12607100 | -0.15115600 |             |             |
|                  |                              | O                | 5.21881200       | 0.70527700  | 0.29310800  |             |             |
|                  |                              | CBr <sub>4</sub> | NCO <sup>-</sup> | Br          | -1.56687500 | -0.92800100 | -1.43936500 |
|                  |                              |                  |                  | Br          | -0.89831300 | 1.92340800  | -0.24233300 |
| Br               | -1.44590200                  |                  |                  | -0.51709300 | 1.69658100  |             |             |
| Br               | 1.23497600                   |                  |                  | -0.43097300 | -0.01354000 |             |             |
| C                | -0.65467300                  |                  |                  | 0.00939600  | -0.00202900 |             |             |
| N                | 3.93527500                   |                  |                  | -1.10935600 | -0.00601300 |             |             |
| C                | 4.60841200                   |                  |                  | -0.13644600 | -0.00186800 |             |             |
|                  | O                            | 5.29932100       | 0.85885600       | 0.00230800  |             |             |             |



|                  |                             |    |             |             |             |
|------------------|-----------------------------|----|-------------|-------------|-------------|
| CBr <sub>3</sub> | N <sub>3</sub> <sup>-</sup> | Br | 1.08284800  | -0.00041100 | 0.59363600  |
|                  |                             | Br | -1.50853400 | 1.59441100  | -0.41826600 |
|                  |                             | Br | -1.50908500 | -1.59397900 | -0.41880600 |
|                  |                             | C  | -0.85282100 | -0.00004200 | 0.48266100  |
|                  |                             | N  | 4.05557400  | 0.00004300  | -0.47392000 |
|                  |                             | N  | 3.86045200  | -0.00072500 | 0.68337200  |
|                  |                             | N  | 4.24035300  | 0.00080700  | -1.62120500 |
|                  |                             | F  | -1.36230500 | -0.00015200 | 1.72295000  |
| CBr <sub>4</sub> | N <sub>3</sub> <sup>-</sup> | Br | -1.13220000 | -0.64193600 | 1.76449700  |
|                  |                             | Br | 1.25522300  | 0.52801100  | 0.00184600  |
|                  |                             | Br | -1.74132600 | 1.51023500  | -0.47465700 |
|                  |                             | Br | -0.90142900 | -1.42953100 | -1.29246000 |
|                  |                             | C  | -0.61961300 | -0.00507100 | -0.00099500 |
|                  |                             | N  | 4.38031400  | 0.05356700  | 0.00156100  |
|                  |                             | N  | 3.91287700  | 1.13086000  | 0.00367000  |
|                  |                             | N  | 4.83657000  | -1.01397300 | -0.00050800 |
